# Supplementary material for: Designing Anthropomorphic Enterprise Conversational Agents
Source: Springer Nature journal article supplement (doi:10.1007/s12599-020-00639-y), 2020-03-10
Supplement: MOESM1 [file 17787714]

# **Designing Anthropomorphic Enterprise Conversational Agents**

**Stephan Diederich, Alfred Benedikt Brendel, Lutz M. Kolbe**

Business & Information Systems Engineering (2020)

**Appendix (available online via <http://link.springer.com>)**

## Appendix

**Table 7** Participants in qualitative requirements elicitation and evaluation

| <b>Design Cycle</b>       | <b>Research Method</b>                                                                                                        | <b>Pseudo-nym</b> | <b>Gender</b> | <b>Role and Individual Background</b>                                                             |
|---------------------------|-------------------------------------------------------------------------------------------------------------------------------|-------------------|---------------|---------------------------------------------------------------------------------------------------|
| 1<br>Awareness of Problem | Semi-structured interviews on requirements and iterative coding                                                               | HR01              | Female        | Head of Global HR Marketing & Recruiting at Company, Educational Background in Marketing          |
|                           |                                                                                                                               | HR02              | Female        | Senior Expert HR at Case Company, Educational Background in Marketing                             |
|                           |                                                                                                                               | TP01              | Male          | Master Student of Information Systems at German University, Member of Company's Talent Pool       |
|                           |                                                                                                                               | TP02              | Male          | Bachelor Student of Business Administration at German University, Member of Company's Talent Pool |
|                           |                                                                                                                               | TP03              | Female        | Student of Medicine at German University, Member of Company's Talent Pool                         |
|                           |                                                                                                                               | TP04              | Male          | Master Student of Business Administration at German University, Member of Company's Talent Pool   |
| 1<br>Evaluation           | Free form feedback in survey after interaction with 1 <sup>st</sup> prototype and open coding                                 | TP11              | Male          | Master Student of Business Administration at Danish University, Consultant Intern at Company      |
|                           |                                                                                                                               | TP12              | Male          | Master Student of Business Administration at German University, Member of Company's Talent Pool   |
|                           |                                                                                                                               | TP13              | Female        | Master Student of Business Administration at Swiss University, Member of Company's Talent Pool    |
|                           |                                                                                                                               | TP14              | Male          | Bachelor Student of Economics at German University, Member of Company's Talent Pool               |
|                           |                                                                                                                               | TP15              | Male          | Master Student of Business Administration at German University, Consultant Intern at Company      |
|                           |                                                                                                                               | TP16              | Male          | Bachelor Student of Engineering at German University, Member of Company's Talent Pool             |
|                           |                                                                                                                               | TP17              | Male          | Master Student of Political Science at German University, Member of Company's Talent Pool         |
| 2<br>Evaluation           | Two focus group sessions with 2 <sup>nd</sup> prototype interaction and gathering of strengths and weaknesses of the artifact | HR21              | Female        | Head of Global HR Marketing & Recruiting at Company, Educational Background in Marketing          |
|                           |                                                                                                                               | HR22              | Female        | Senior Expert HR at Company, Educational Background in Marketing                                  |
|                           |                                                                                                                               | HR23              | Female        | Junior Expert HR at Company, Educational Background in Business Administration                    |
|                           |                                                                                                                               | HR24              | Female        | Expert for Marketing at Company, Educational Background in Marketing                              |
|                           |                                                                                                                               | TP21              | Male          | Master Student of Information Systems at German University, Member of Company's Talent Pool       |
|                           |                                                                                                                               | TP22              | Male          | Master Student of Business Administration at German University, Member of Company's Talent Pool   |
|                           |                                                                                                                               | TP23              | Female        | Student of Medicine at German University, Member of Company's Talent Pool                         |

**Table 8** Meta-requirements and exemplary quotes from interviews  
(material translated to English)

| <b>Meta-Requirement</b>                | <b>Exemplary Quote(s) and Source</b>                                                                                                                                                                                                                                                                                                                                                                                                                                                                                                                                                                                                                                                                                                                                                                                                                                                                                                                                 |
|----------------------------------------|----------------------------------------------------------------------------------------------------------------------------------------------------------------------------------------------------------------------------------------------------------------------------------------------------------------------------------------------------------------------------------------------------------------------------------------------------------------------------------------------------------------------------------------------------------------------------------------------------------------------------------------------------------------------------------------------------------------------------------------------------------------------------------------------------------------------------------------------------------------------------------------------------------------------------------------------------------------------|
| User Understanding (MR1)               | <p><i>“the bot should be able to answer detailed, follow-up questions that could come up in a specific topic area as long as they can be anticipated” – TP04</i></p> <p><i>“it should understand context-specific questions for the recruiting process [...], for example, what are typical questions on the interview day?” – TP03</i></p>                                                                                                                                                                                                                                                                                                                                                                                                                                                                                                                                                                                                                          |
| Informative Responses (MR2)            | <p><i>“the bot somehow represents the company’s image, so questions should be answered informatively” – TP01</i></p> <p><i>“the bot has to be able to remember and logically connect what has been communicated in the conversation [...]. It needs to understand and address what I have said, it should not always offer the same standardized reply” – TP04</i></p>                                                                                                                                                                                                                                                                                                                                                                                                                                                                                                                                                                                               |
| System Transparency (MR3)              | <p><i>“In my opinion showing what the bot can do is good as people otherwise have the expectation that it is like Siri and can answer every kind of question [...] It would be useful if the bot says I can answer this and answer that at the beginning” –HR02</i></p> <p><i>“The bot should say that it is here to only help and support [the user for the recruiting day], also without tracking individual performance or the like” – HR01</i></p> <p><i>“It would be great if the bot would identify itself as a machine in a sympathetic, playful way” – TP01</i></p> <p><i>“I think it is more appealing if the bot clearly describes that it is a computer but it also has certain human characteristics” – TP02</i></p> <p><i>“the expectation gap is a problem [...] I’m always disappointed if I ask Siri something and she does not understand me. It should clearly delineate areas in which it can provide as good replies as possible” – TP01</i></p> |
| Exit Option (MR4)                      | <p><i>“Personally, I find it helpful if for example e-mail addresses of HR contacts are provided” – TP02</i></p> <p><i>“In the best case, the bot immediately responds with contact data of an actual person that I can approach with my question” –TP03</i></p>                                                                                                                                                                                                                                                                                                                                                                                                                                                                                                                                                                                                                                                                                                     |
| Support in Conversation (MR5)          | <p><i>“I don’t know if this is technically possible, but it would be great to have the opportunity to state a solution and then receive feedback whether it is correct and whether the solution approach is suitable” – TP02</i></p>                                                                                                                                                                                                                                                                                                                                                                                                                                                                                                                                                                                                                                                                                                                                 |
| Conversation Repair and Fallback (MR6) | <p><i>“the bot should indicate that it is not able to answer the specific question – in a sympathetic way to reduce a user’s disappointment” – TP01</i></p> <p><i>“in the best case, the bot would support the reformulation of the user’s request that would then allow it to understand the user” – TP01</i></p> <p><i>“[if the bot cannot answer a question] it should politely state something like I am sorry that I cannot offer a reply, please feel free to contact us under...” – TP04</i></p>                                                                                                                                                                                                                                                                                                                                                                                                                                                              |

**Table 9** Issues of prototype and exemplary quotes from free-form feedback (material translated to English)

| Primary Issue                                     | Exemplary Quote(s) and Source                                                                                                                                                                                                                                                                                                                                                                                                                                                                                                                                                                                                                                                                                                                                                                                                                                                                                                                                                                                                                                                         |
|---------------------------------------------------|---------------------------------------------------------------------------------------------------------------------------------------------------------------------------------------------------------------------------------------------------------------------------------------------------------------------------------------------------------------------------------------------------------------------------------------------------------------------------------------------------------------------------------------------------------------------------------------------------------------------------------------------------------------------------------------------------------------------------------------------------------------------------------------------------------------------------------------------------------------------------------------------------------------------------------------------------------------------------------------------------------------------------------------------------------------------------------------|
| Mechanical and inhuman feeling in the interaction | <p><i>„it is not very human-like, you realize that the replies repeat themselves frequently and that follow-up questions are not possible. In comparison to a real-life job interview with a consultant, the bot is not able to respond to spontaneous questions” – TP11</i></p> <p><i>„the chatbot is a bit too friendly, in my opinion it uses too many smileys” – TP15</i></p> <p><i>“it is clear that the technology is still far away from simulating real human behavior [in a job interview]” – TP12</i></p> <p><i>“the quantitative and multiple-choice parts of the interviews are okay; however, it lacks flexibility in the interaction for the more creative interview questions” – TP15</i></p> <p><i>“the bot’s name is strange, I would use a normal human name and image – TP15</i></p> <p><i>„the job interview is too mechanic, a case-study interview is about (creatively) approaching business problems. This opportunity is currently missed” – TP17</i></p> <p><i>“the bot’s image is unappealing, I would use the image of an actual employee” – TP15</i></p> |
| Lack of responsiveness                            | <p><i>“the computer obviously reacts to keywords, which often leads to misunderstandings” – TP12</i></p> <p><i>“I had to reply manually multiple times until the chatbot understood that I wanted to do a case-study interview [...] this could lead to very frustrated users and immediately diminished the human-like interaction (if it misunderstands me already at the beginning, how can it be able to do a job interview with me?)” – TP16</i></p> <p><i>“the bot only understands straight-forward responses, creative approaches are not appreciated” – TP17</i></p>                                                                                                                                                                                                                                                                                                                                                                                                                                                                                                         |
| Further technical issues with web interface       | <p><i>„the input field does not allow to make line breaks; the field is extended continuously which makes you lose the overview” – TP12</i></p> <p><i>“a long delay exists when pressing “Enter“ after adding input, which led me to enter a response multiple times” – TP12</i></p> <p><i>“the computer should recognize when the user starts entering a second statement and then wait for the message to be sent. This would be more in line with a natural chat dialogue” – TP15</i></p>                                                                                                                                                                                                                                                                                                                                                                                                                                                                                                                                                                                          |

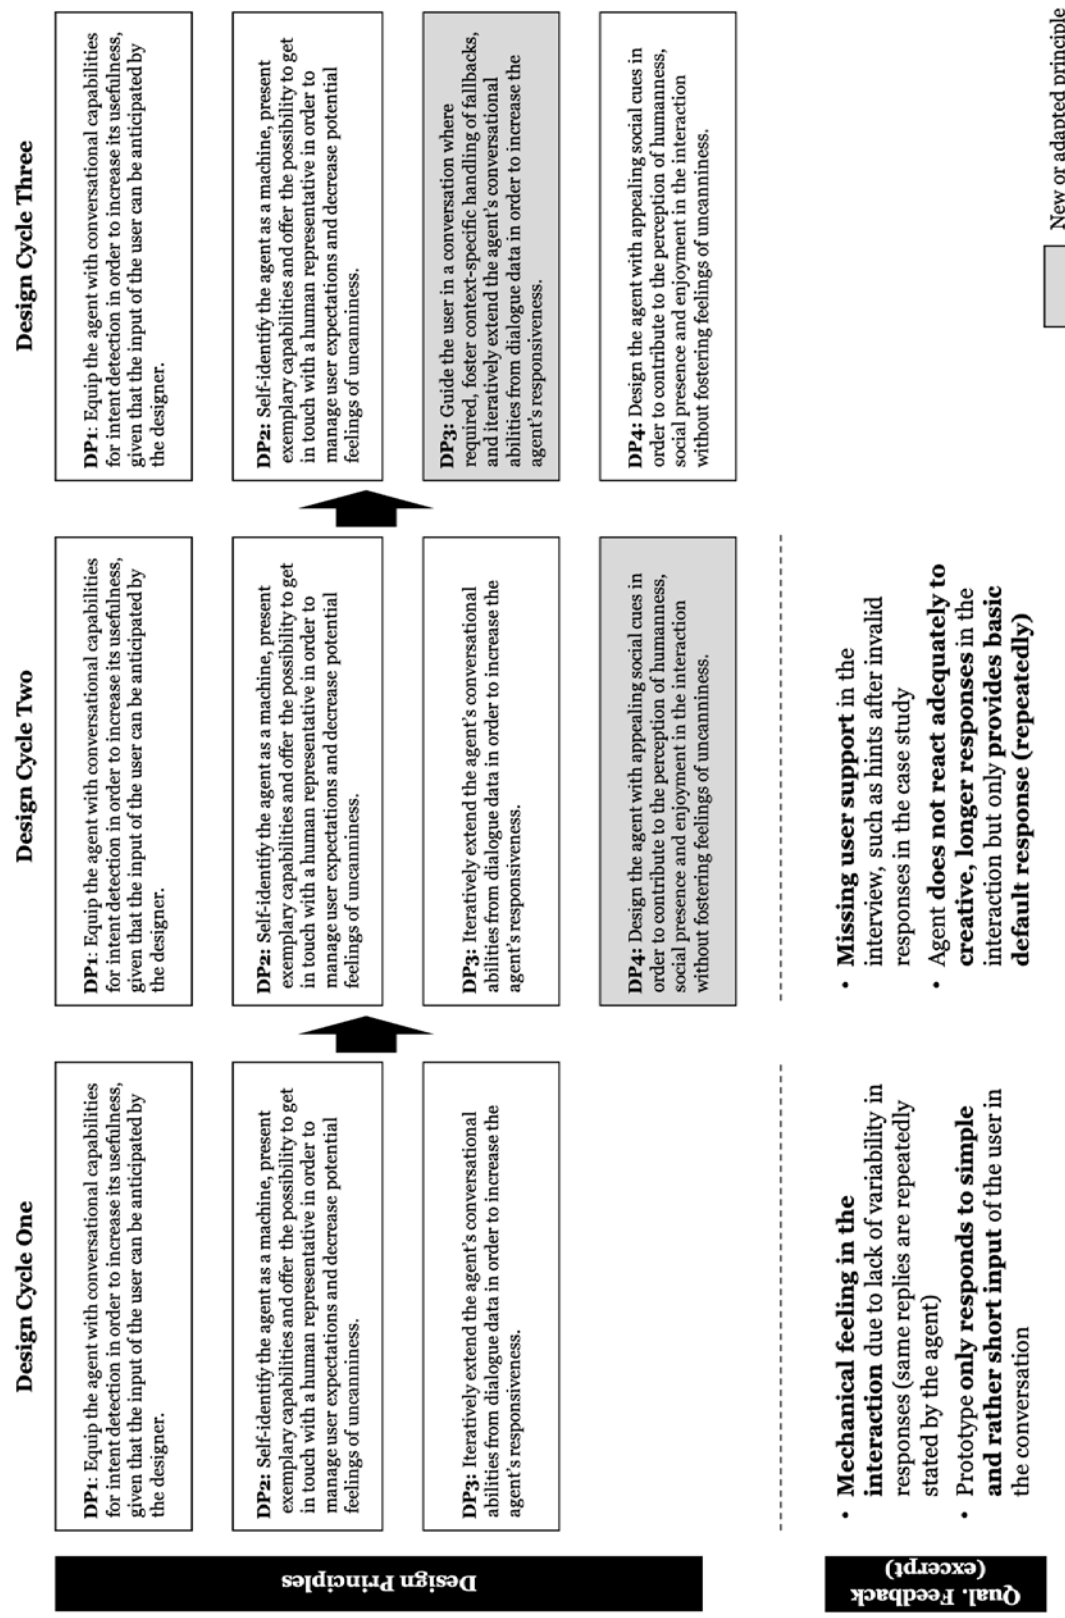

**Figure 6** Evolution of design principles and qualitative feedback
